# Supplementary material for: Non-native autoinducer analogs capable of modulating the SdiA quorum sensing receptor in Salmonella enterica serovar Typhimurium
Source: PubMed Central journal article supplement (PMC6204753; doi:10.3762/bjoc.14.243), 2018-10-17

## Supporting Information File 2

for

### Non-native autoinducer analogs capable of modulating the SdiA quorum sensing receptor in *Salmonella enterica* serovar Typhimurium

Matthew J. Styles and Helen E. Blackwell\*

Address: Department of Chemistry, University of Wisconsin–Madison, 1101 University Avenue, Madison, WI 53706, USA

\* Corresponding author

Email: Helen E. Blackwell - [blackwell@chem.wisc.edu](mailto:blackwell@chem.wisc.edu)

### Full dose–response curves

Agonism and antagonism dose-response curves in support of data listed in Tables 1–4 in the main text. Plots corresponding to these data as listed on the pages below:

- **Table S1:** Pages S2–S4  
Agonism dose-response curves for compounds **F2** to **11-Az** in the *S. Typhimurium*-pJNS25 reporter strain.
- **Table S2:** Page S5  
Agonism dose-response curves for compounds **A1** to **C24** in the *S. Typhimurium*-pJNS25 reporter strain.
- **Table S3:** Pages S6–S8  
Agonism (black) and antagonism (red) dose-response curves for compounds **11 (ITC-12)** to **S2** in the *S. Typhimurium*-pJNS25 reporter strain. Antagonists competed against the EC<sub>90</sub> of **2** (OOHL), 10 nM.
- **Table S4:** Page S9  
Antagonism dose-response curves for compounds **11 (ITC-12)**, **R8**, **16**, and **F45** in the *E. coli* JLD271-pJN105SE-pSC11SE reporter strain. Antagonists competed against the EC<sub>50</sub> of **2** (OOHL), 1.5 nM. Agonism dose-response curve for **2** (OOHL) also included.

All assay protocols are described in the Experimental Section in the main text.

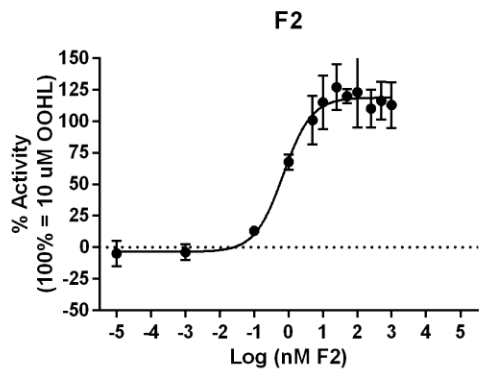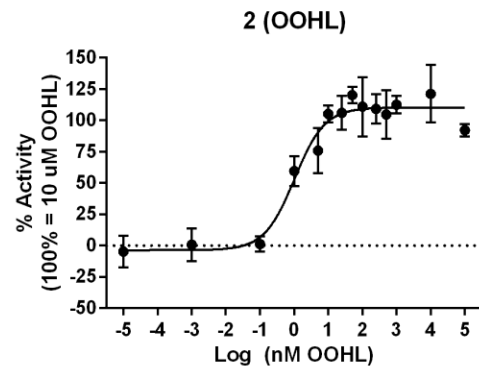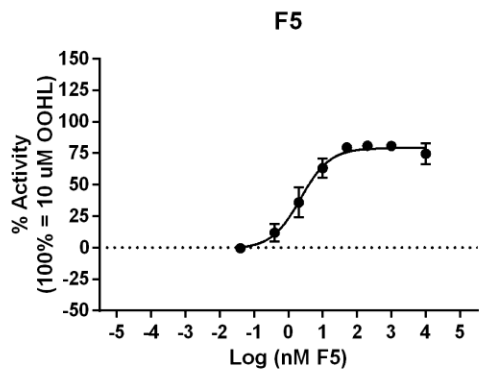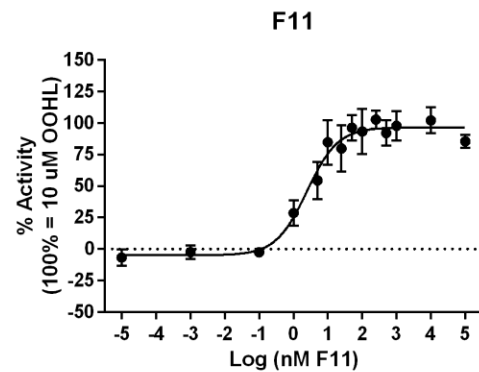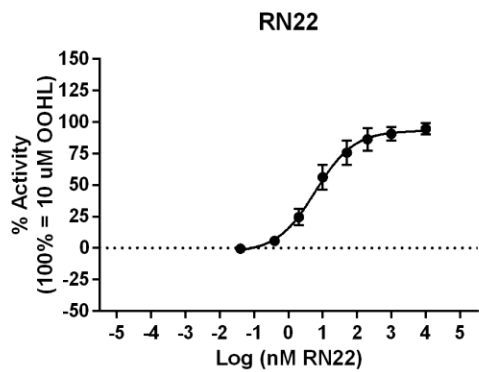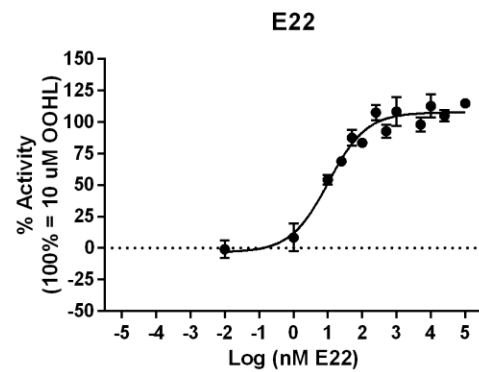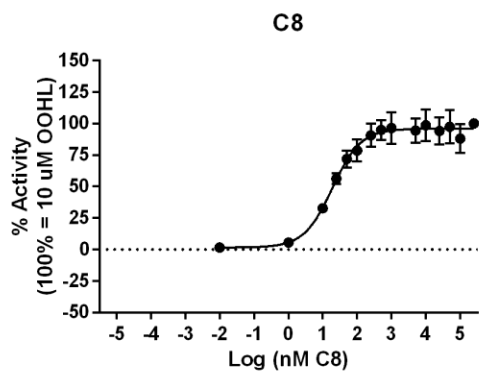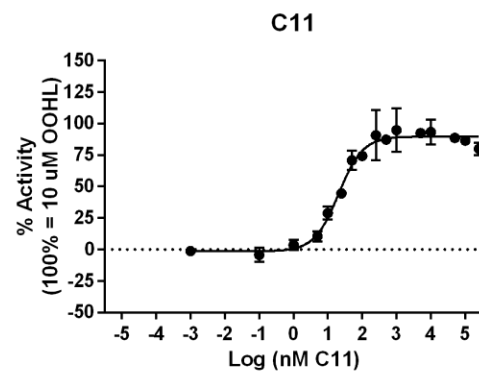

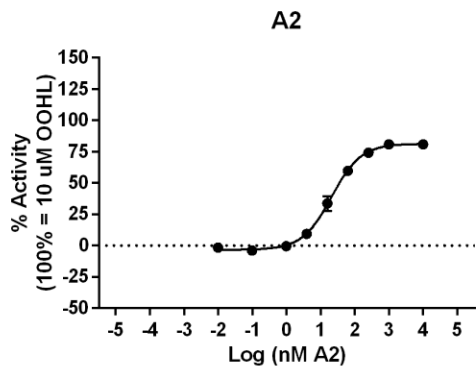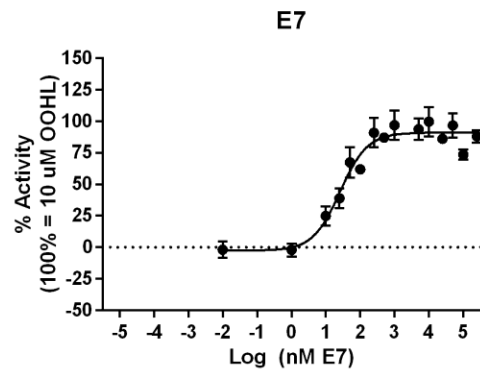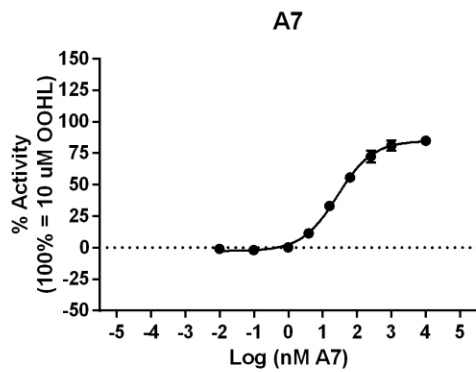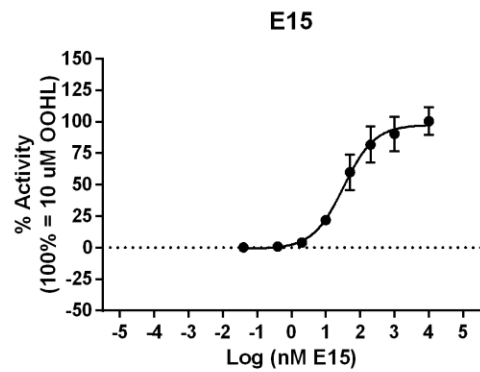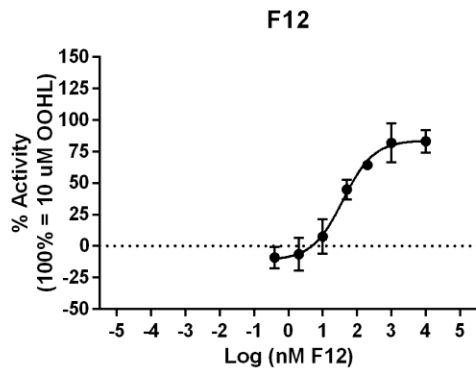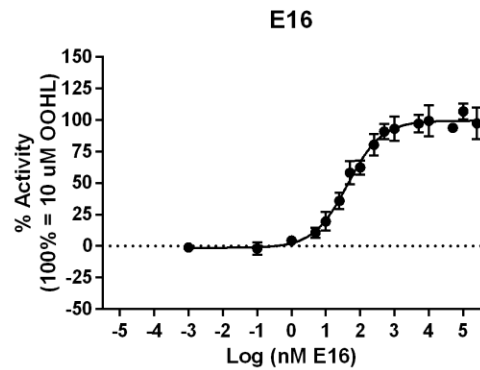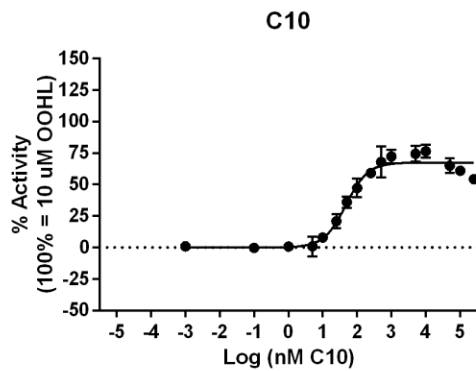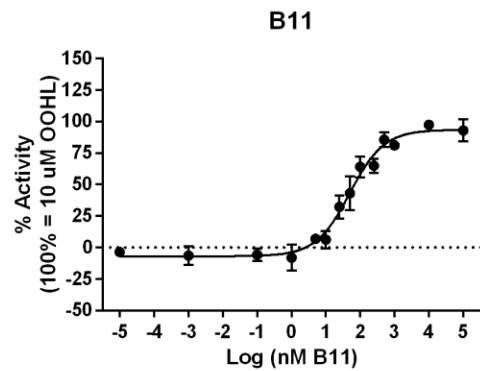

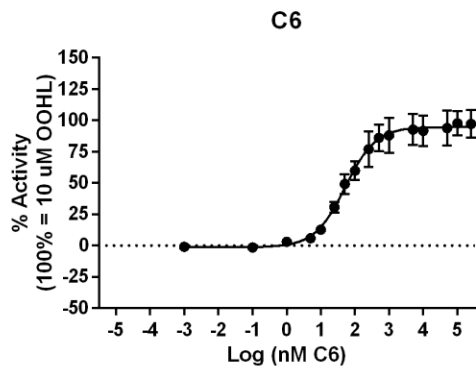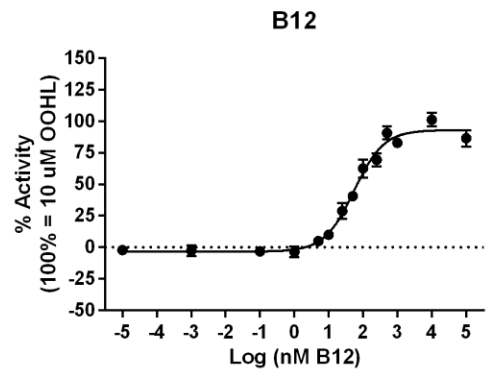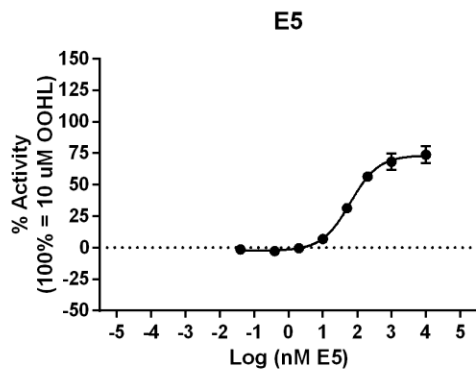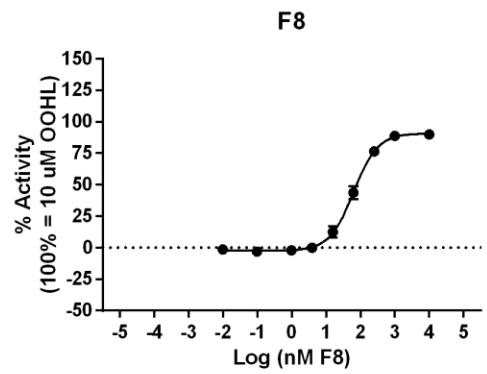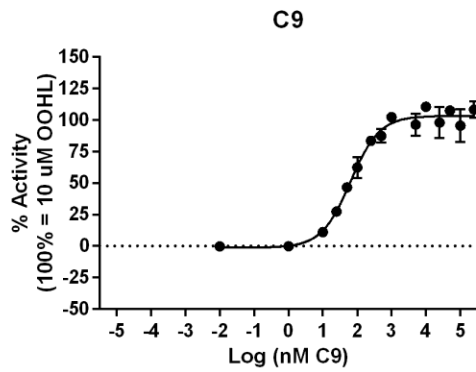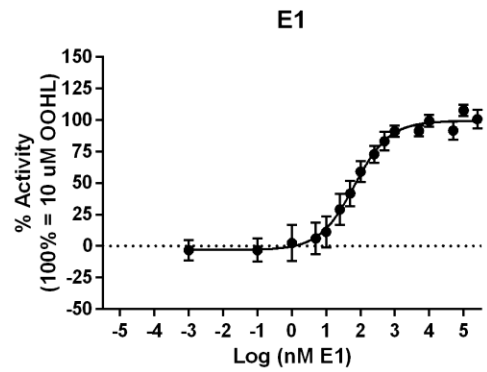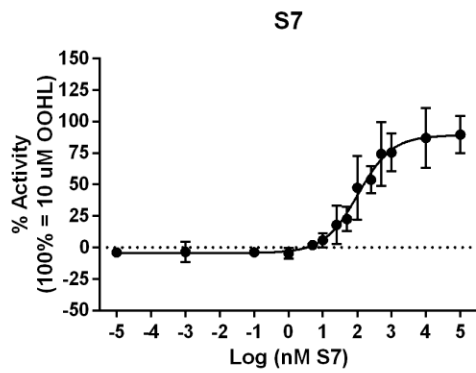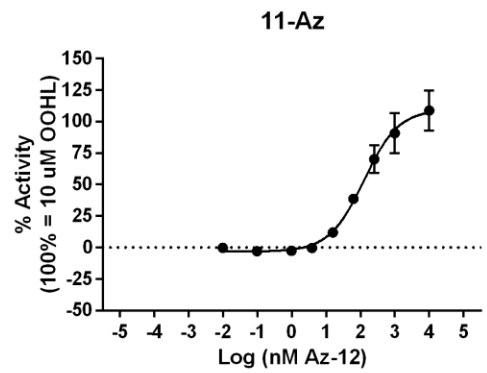

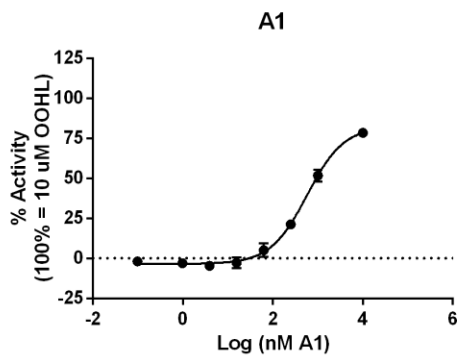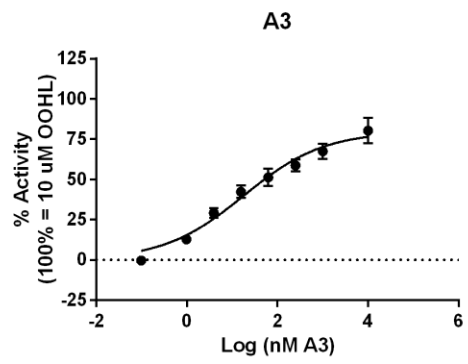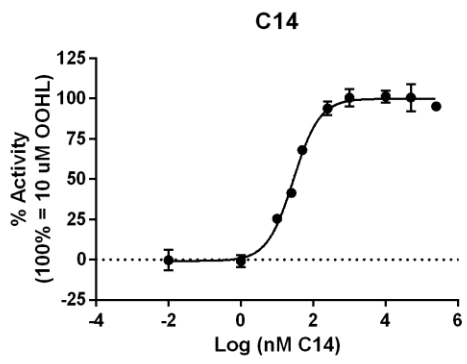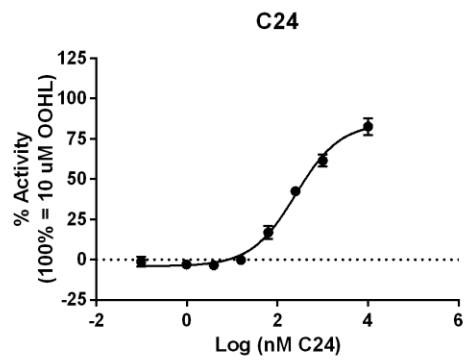

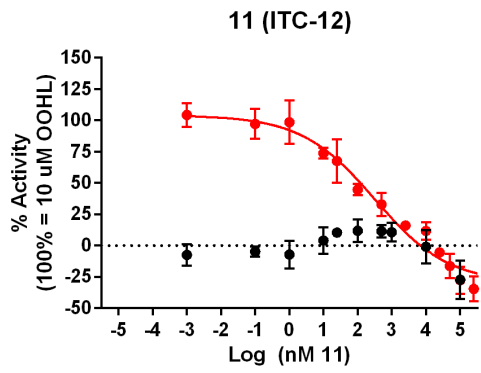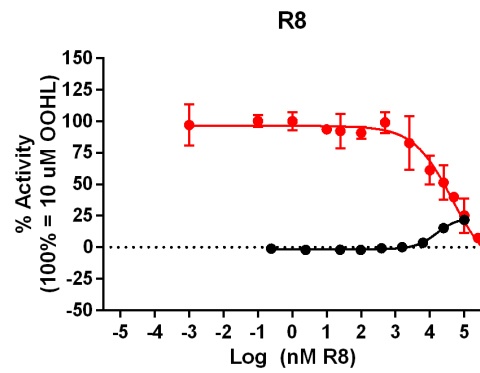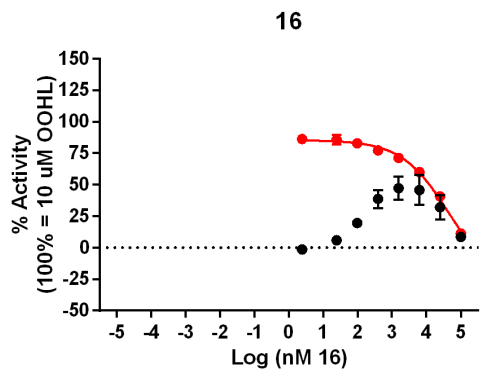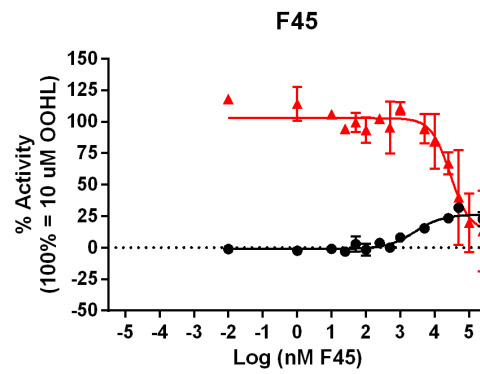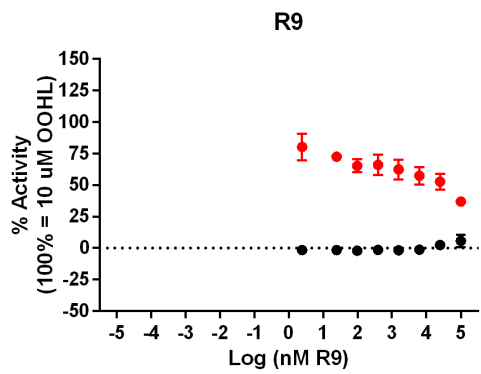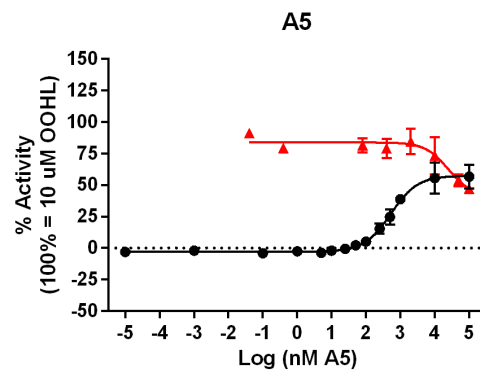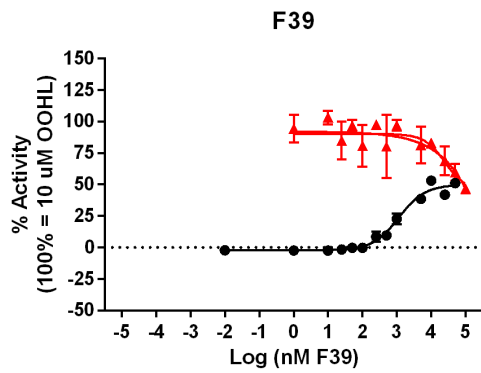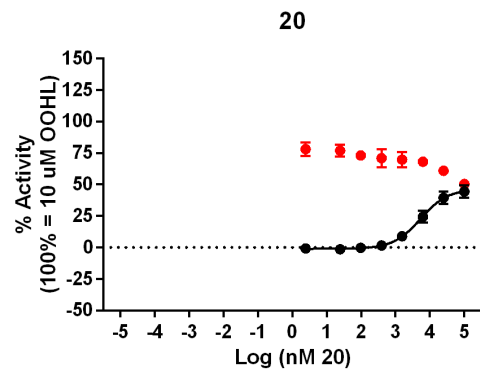

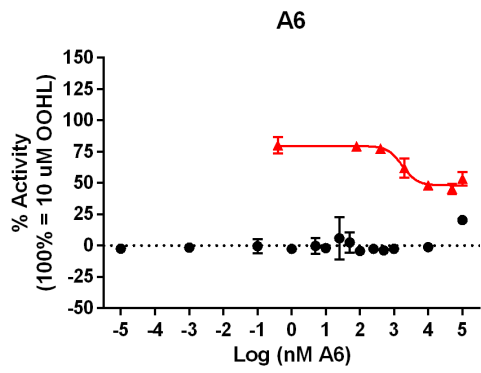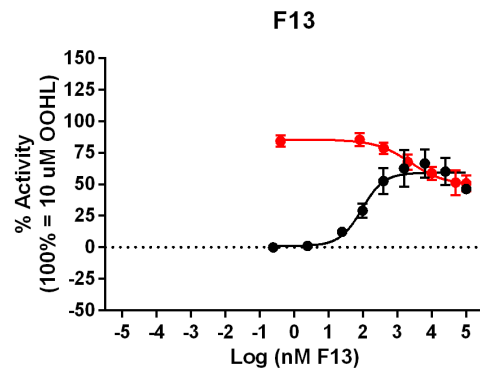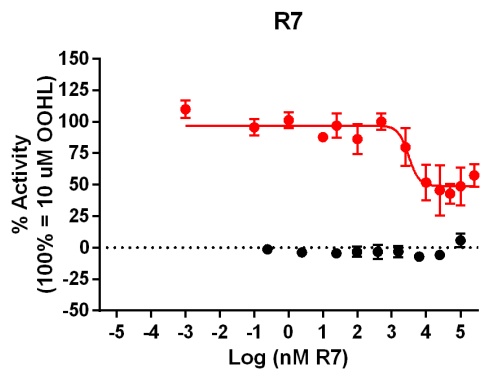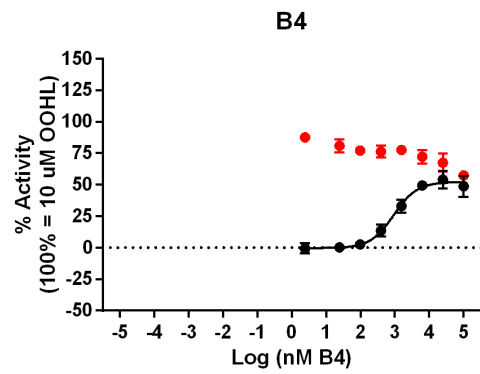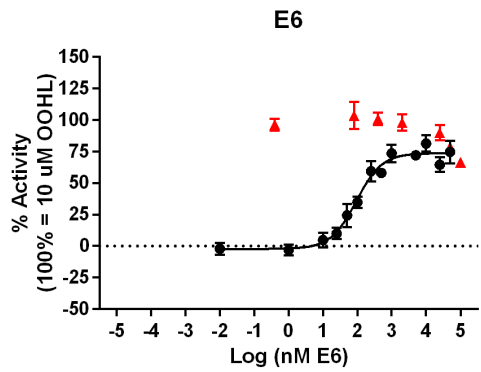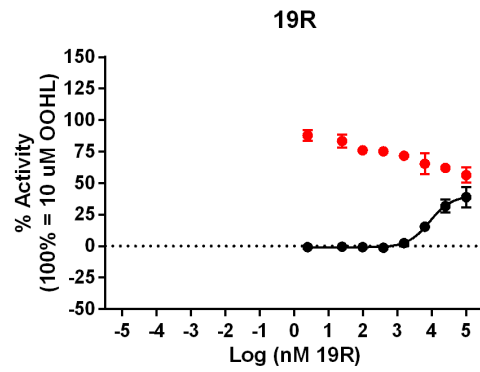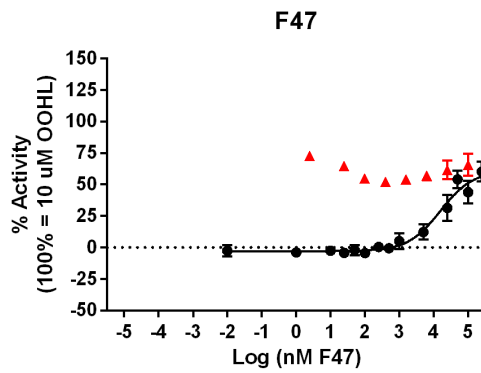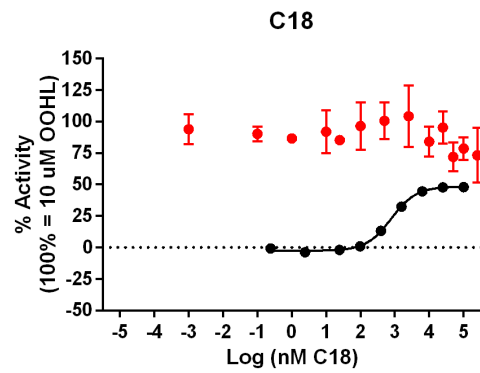

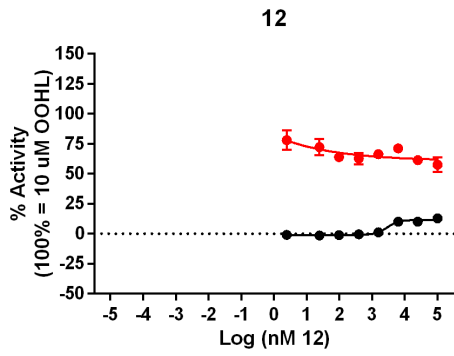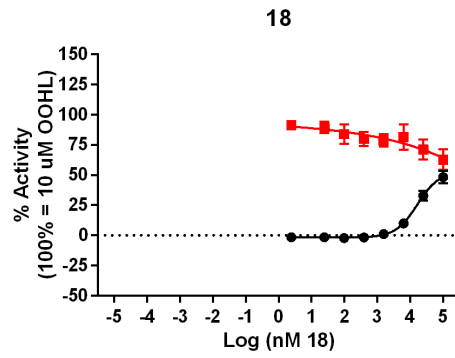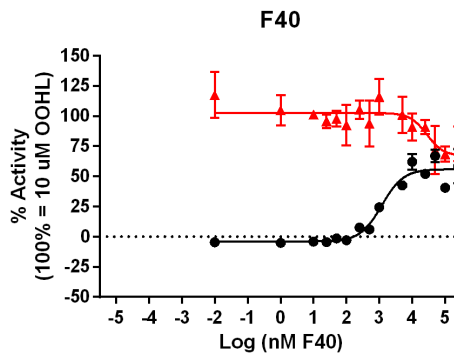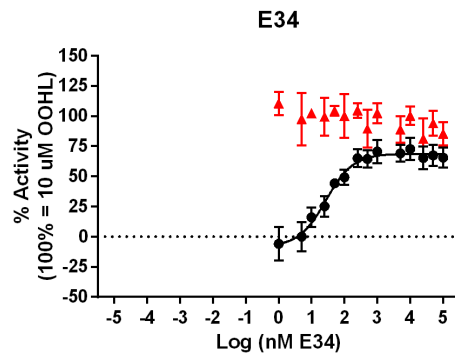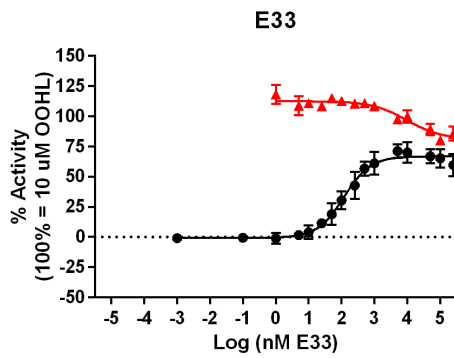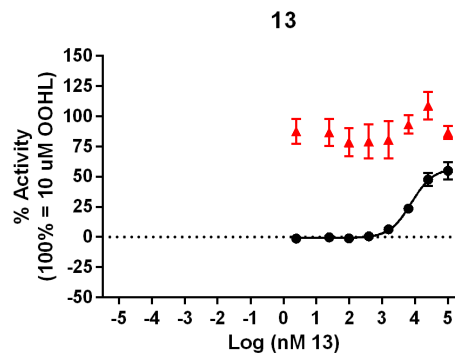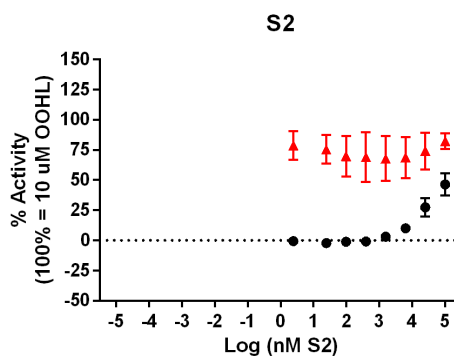



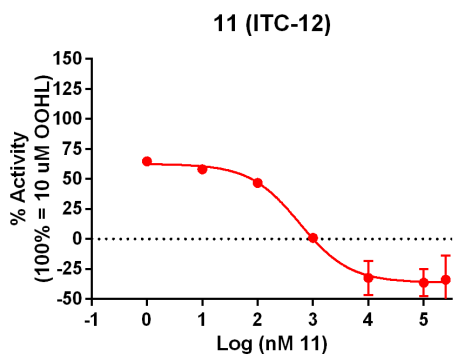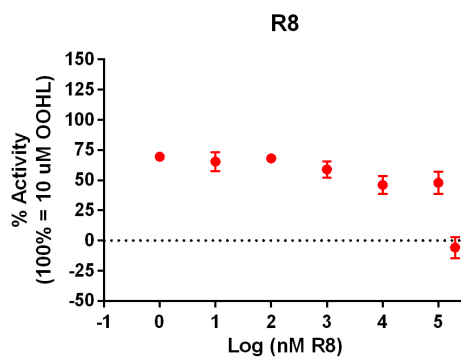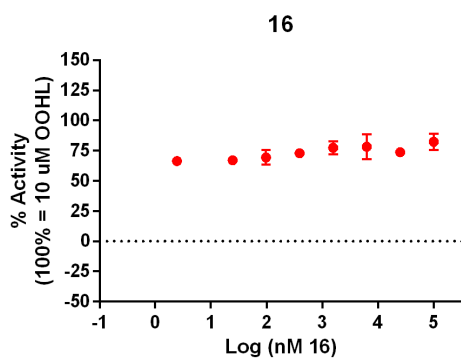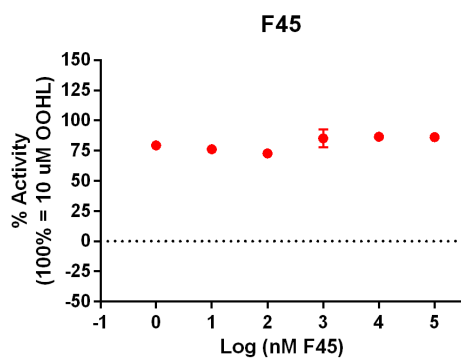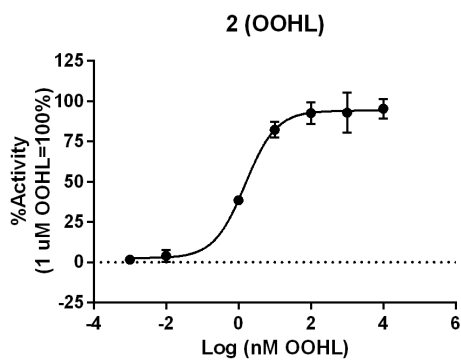

Supplement: Beilstein_J_Org_Chem-14-2651-s002.pdf [file Beilstein_J_Org_Chem-14-2651-s002.pdf]
