# Supplementary material for: Non-native autoinducer analogs capable of modulating the SdiA quorum sensing receptor in Salmonella enterica serovar Typhimurium
Source: PubMed Central journal article supplement (PMC6204753; doi:10.3762/bjoc.14.243), 2018-10-17
Supplement: Beilstein_J_Org_Chem-14-2651-s001.pdf [file Beilstein_J_Org_Chem-14-2651-s001.pdf]

# Supporting Information File 1

for

## **Non-native autoinducer analogs capable of modulating the SdiA quorum sensing receptor in *Salmonella enterica* serovar Typhimurium**

Matthew J. Styles and Helen E. Blackwell\*

Address: Department of Chemistry, University of Wisconsin–Madison, 1101 University Avenue,  
Madison, WI 53706, USA

\* Corresponding author

Email: Helen E. Blackwell - [blackwell@chem.wisc.edu](mailto:blackwell@chem.wisc.edu)

### **Compound library structures and screening results**

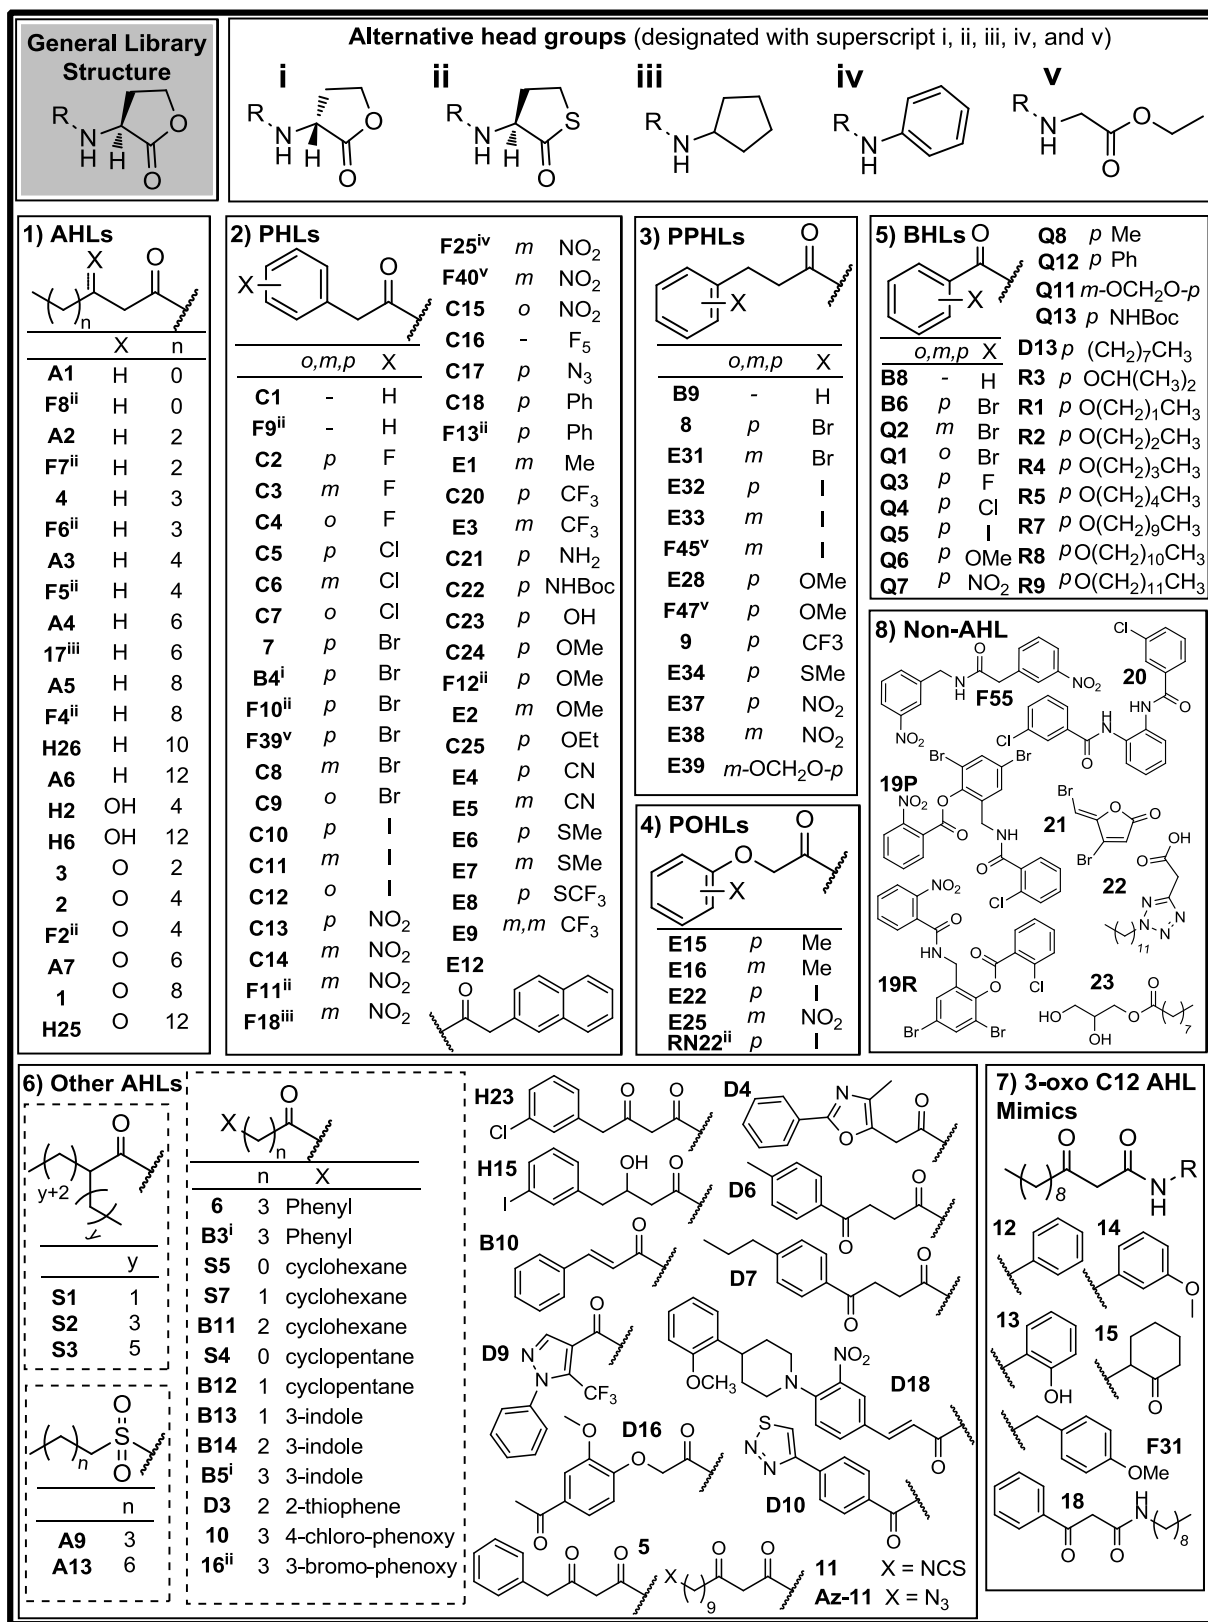

**Figure S1: Structures of compounds evaluated in this study.** Compounds listed by general structure class. Original sub-library letter names (A, B, C, D, E, F, H, Q, R, S, and 1–22) from our prior publications are indicated in compound names. See main text.

**Table S1:** Single-concentration screening data in *S. Typhimurium*-pJNS25 SdiA reporter strain.<sup>a</sup>

| compound   | Agonism <sup>b</sup>      |                           | Antagonism <sup>c</sup>     |                             |
|------------|---------------------------|---------------------------|-----------------------------|-----------------------------|
|            | 1 $\mu$ M                 | 100 $\mu$ M               | 1 $\mu$ M                   | 100 $\mu$ M                 |
|            | Activity (%) <sup>d</sup> | Activity (%) <sup>d</sup> | Inhibition (%) <sup>e</sup> | Inhibition (%) <sup>e</sup> |
| <b>A1</b>  | 41 $\pm$ 6                | 104 $\pm$ 8               | 7 $\pm$ 5                   | -10 $\pm$ 11                |
| <b>F8</b>  | 81 $\pm$ 1                | 127 $\pm$ 11              | -5 $\pm$ 10                 | -23 $\pm$ 11                |
| <b>A2</b>  | 84 $\pm$ 5                | 83 $\pm$ 2                | 15 $\pm$ 4                  | 3 $\pm$ 1                   |
| <b>F7</b>  | 78 $\pm$ 5                | 117 $\pm$ 9               | 7 $\pm$ 9                   | -12 $\pm$ 4                 |
| <b>4</b>   | 66 $\pm$ 9                | 59 $\pm$ 9                | 26 $\pm$ 4                  | 16 $\pm$ 5                  |
| <b>F6</b>  | 78 $\pm$ 1                | 87 $\pm$ 9                | 5 $\pm$ 5                   | -2 $\pm$ 7                  |
| <b>A3</b>  | 76 $\pm$ 7                | 89 $\pm$ 13               | 10 $\pm$ 8                  | 13 $\pm$ 14                 |
| <b>F5</b>  | 85 $\pm$ 2                | 79 $\pm$ 4                | 3 $\pm$ 6                   | 0 $\pm$ 6                   |
| <b>A4</b>  | 59 $\pm$ 3                | 75 $\pm$ 11               | 12 $\pm$ 19                 | 18 $\pm$ 7                  |
| <b>17</b>  | 3 $\pm$ 4                 | 47 $\pm$ 3                | 26 $\pm$ 12                 | 28 $\pm$ 5                  |
| <b>A5</b>  | 45 $\pm$ 2                | 57 $\pm$ 5                | 17 $\pm$ 10                 | 43 $\pm$ 4                  |
| <b>F4</b>  | 62 $\pm$ 2                | 93 $\pm$ 16               | -2 $\pm$ 11                 | 2 $\pm$ 5                   |
| <b>H26</b> | 19 $\pm$ 6                | 39 $\pm$ 12               | 5 $\pm$ 14                  | 0 $\pm$ 8                   |
| <b>A6</b>  | 12 $\pm$ 3                | 39 $\pm$ 3                | 17 $\pm$ 12                 | 38 $\pm$ 5                  |
| <b>H2</b>  | 77 $\pm$ 4                | 74 $\pm$ 12               | 8 $\pm$ 5                   | 12 $\pm$ 16                 |
| <b>H6</b>  | 3 $\pm$ 3                 | 51 $\pm$ 14               | 15 $\pm$ 1                  | 15 $\pm$ 13                 |
| <b>3</b>   | 75 $\pm$ 14               | 75 $\pm$ 15               | 6 $\pm$ 16                  | 20 $\pm$ 2                  |
| <b>2</b>   | 78 $\pm$ 11               | 86 $\pm$ 18               | -2 $\pm$ 9                  | 9 $\pm$ 5                   |
| <b>F2</b>  | 116 $\pm$ 6               | 88 $\pm$ 19               | -19 $\pm$ 12                | -19 $\pm$ 15                |
| <b>A7</b>  | 86 $\pm$ 9                | 100 $\pm$ 4               | -4 $\pm$ 19                 | -2 $\pm$ 10                 |
| <b>1</b>   | 71 $\pm$ 8                | 94 $\pm$ 8                | 2 $\pm$ 17                  | 15 $\pm$ 16                 |
| <b>H25</b> | 55 $\pm$ 8                | 57 $\pm$ 10               | 1 $\pm$ 13                  | -9 $\pm$ 15                 |
| <b>C1</b>  | 40 $\pm$ 4                | 90 $\pm$ 5                | 9 $\pm$ 12                  | -6 $\pm$ 5                  |
| <b>F9</b>  | 76 $\pm$ 1                | 113 $\pm$ 6               | -1 $\pm$ 4                  | -13 $\pm$ 1                 |
| <b>C2</b>  | 56 $\pm$ 1                | 93 $\pm$ 5                | 2 $\pm$ 8                   | -8 $\pm$ 18                 |
| <b>C3</b>  | 56 $\pm$ 2                | 111 $\pm$ 9               | -1 $\pm$ 15                 | -18 $\pm$ 12                |
| <b>C4</b>  | 45 $\pm$ 3                | 121 $\pm$ 14              | 3 $\pm$ 6                   | -31 $\pm$ 10                |
| <b>C5</b>  | 65 $\pm$ 8                | 85 $\pm$ 4                | 13 $\pm$ 6                  | 18 $\pm$ 7                  |
| <b>C6</b>  | 85 $\pm$ 4                | 120 $\pm$ 2               | 9 $\pm$ 16                  | -20 $\pm$ 6                 |
| <b>C7</b>  | 75 $\pm$ 10               | 132 $\pm$ 6               | 22 $\pm$ 6                  | -32 $\pm$ 5                 |
| <b>7</b>   | 71 $\pm$ 10               | 68 $\pm$ 11               | 26 $\pm$ 9                  | 21 $\pm$ 10                 |
| <b>B4</b>  | 26 $\pm$ 6                | 65 $\pm$ 3                | 41 $\pm$ 15                 | 16 $\pm$ 11                 |
| <b>F10</b> | 68 $\pm$ 3                | 57 $\pm$ 8                | 8 $\pm$ 12                  | -3 $\pm$ 7                  |

<sup>a</sup>Compounds listed according to order in Figure S1. <sup>b</sup>Agonism and <sup>c</sup>antagonism assays performed as described in the Experimental Section at 1  $\mu$ M and 100  $\mu$ M compound. All assays performed in triplicate. <sup>d</sup>Activation reported as the average ( $\pm$ STD) of the percentage (%) of activity normalized to 10  $\mu$ M **2** (OOHL). <sup>e</sup>Inhibition reported as the average ( $\pm$ STD) of the change in the activity (%) from 10 nM **2** (OOHL). <sup>f</sup>Cell growth inhibited at this compound concentration.

| <i>Continued...</i> | Agonism <sup>b</sup>      |                           | Antagonism <sup>c</sup>     |                             |
|---------------------|---------------------------|---------------------------|-----------------------------|-----------------------------|
| compound            | 1 $\mu$ M                 | 100 $\mu$ M               | 1 $\mu$ M                   | 100 $\mu$ M                 |
|                     | Activity (%) <sup>d</sup> | Activity (%) <sup>d</sup> | Inhibition (%) <sup>e</sup> | Inhibition (%) <sup>e</sup> |
| <b>F39</b>          | 16.4 $\pm$ 0.4            | 31 $\pm$ 3                | 27 $\pm$ 9                  | 53 $\pm$ 11                 |
| <b>C8</b>           | 88 $\pm$ 10               | 100 $\pm$ 15              | 21 $\pm$ 10                 | -22 $\pm$ 9                 |
| <b>C9</b>           | 97 $\pm$ 13               | 156 $\pm$ 10              | 9 $\pm$ 8                   | -48 $\pm$ 13                |
| <b>C10</b>          | 83 $\pm$ 1                | 95 $\pm$ 15               | 28 $\pm$ 6                  | 27 $\pm$ 13                 |
| <b>C11</b>          | 87 $\pm$ 7                | 109 $\pm$ 7               | 15 $\pm$ 11                 | -4 $\pm$ 2                  |
| <b>C12</b>          | 72 $\pm$ 2                | 125 $\pm$ 13              | 9 $\pm$ 13                  | -24 $\pm$ 12                |
| <b>C13</b>          | 58 $\pm$ 4                | 98 $\pm$ 4                | 24 $\pm$ 4                  | 14 $\pm$ 9                  |
| <b>C14</b>          | 79 $\pm$ 8                | 110 $\pm$ 9               | 0 $\pm$ 3                   | -17 $\pm$ 9                 |
| <b>F11</b>          | 87 $\pm$ 6                | 103 $\pm$ 17              | -11 $\pm$ 7                 | -16 $\pm$ 13                |
| <b>F18</b>          | 61 $\pm$ 6                | 69 $\pm$ 13               | 4 $\pm$ 6                   | 15 $\pm$ 3                  |
| <b>F25</b>          | 14 $\pm$ 2                | 74 $\pm$ 9                | 20 $\pm$ 4                  | -2 $\pm$ 14                 |
| <b>F40</b>          | 16 $\pm$ 3                | 50 $\pm$ 8                | 21 $\pm$ 8                  | 43 $\pm$ 4                  |
| <b>C15</b>          | 22 $\pm$ 2                | 110 $\pm$ 10              | 5 $\pm$ 2                   | -17 $\pm$ 18                |
| <b>C16</b>          | 26 $\pm$ 2                | 141 $\pm$ 9               | 5 $\pm$ 3                   | -32 $\pm$ 18                |
| <b>C17</b>          | 59 $\pm$ 2                | 103 $\pm$ 15              | 13 $\pm$ 11                 | 9 $\pm$ 6                   |
| <b>C18</b>          | 28 $\pm$ 1                | 48 $\pm$ 13               | 11 $\pm$ 3                  | 52 $\pm$ 10                 |
| <b>F13</b>          | 43 $\pm$ 6                | 44 $\pm$ 13               | 23 $\pm$ 4                  | 46 $\pm$ 15                 |
| <b>E1</b>           | 84 $\pm$ 3                | 97 $\pm$ 15               | -6 $\pm$ 7                  | -14 $\pm$ 13                |
| <b>C20</b>          | 69 $\pm$ 16               | 86 $\pm$ 6                | 15 $\pm$ 10                 | 8 $\pm$ 6                   |
| <b>E3</b>           | 75 $\pm$ 2                | 89 $\pm$ 14               | -14 $\pm$ 16                | 5 $\pm$ 8                   |
| <b>C21</b>          | 17 $\pm$ 4                | 76 $\pm$ 7                | 4 $\pm$ 12                  | 13 $\pm$ 4                  |
| <b>C22</b>          | 16 $\pm$ 3                | 56 $\pm$ 5                | -9 $\pm$ 2                  | 6 $\pm$ 6                   |
| <b>C23</b>          | 65 $\pm$ 11               | 90 $\pm$ 8                | 6 $\pm$ 2                   | 16 $\pm$ 3                  |
| <b>C24</b>          | 75 $\pm$ 10               | 87 $\pm$ 2                | -11 $\pm$ 3                 | 4 $\pm$ 16                  |
| <b>F12</b>          | 93 $\pm$ 9                | 86 $\pm$ 10               | -13 $\pm$ 10                | -21 $\pm$ 8                 |
| <b>E2</b>           | 73 $\pm$ 4                | 93 $\pm$ 14               | -5 $\pm$ 1                  | -8 $\pm$ 14                 |
| <b>C25</b>          | 64 $\pm$ 11               | 92 $\pm$ 1                | 12 $\pm$ 8                  | 7 $\pm$ 5                   |
| <b>E4</b>           | 74 $\pm$ 1                | 89 $\pm$ 16               | 12 $\pm$ 6                  | -17 $\pm$ 18                |
| <b>E5</b>           | 90 $\pm$ 12               | 100 $\pm$ 16              | 18 $\pm$ 8                  | -8 $\pm$ 4                  |
| <b>E6</b>           | 61 $\pm$ 6                | 64 $\pm$ 16               | 25 $\pm$ 16                 | 44 $\pm$ 13                 |
| <b>E7</b>           | 81 $\pm$ 18               | 93 $\pm$ 15               | 20 $\pm$ 14                 | 12 $\pm$ 13                 |
| <b>E8</b>           | 52 $\pm$ 10               | 82 $\pm$ 10               | 34 $\pm$ 11                 | 31 $\pm$ 7                  |
| <b>E9</b>           | 42 $\pm$ 15               | 61 $\pm$ 1                | 18 $\pm$ 8                  | 21 $\pm$ 8                  |
| <b>E12</b>          | 77 $\pm$ 16               | 67 $\pm$ 5                | -13 $\pm$ 9                 | 0 $\pm$ 15                  |
| <b>B9</b>           | 55 $\pm$ 3                | 96 $\pm$ 5                | 13 $\pm$ 10                 | 18 $\pm$ 14                 |
| <b>8</b>            | 77 $\pm$ 5                | 87 $\pm$ 16               | 15 $\pm$ 8                  | 4 $\pm$ 3                   |
| <b>E31</b>          | 70 $\pm$ 18               | 56 $\pm$ 8                | 13 $\pm$ 10                 | 6 $\pm$ 6                   |
| <b>E32</b>          | 36 $\pm$ 1                | 83 $\pm$ 7                | 19 $\pm$ 14                 | 24 $\pm$ 13                 |
| <b>E33</b>          | 34 $\pm$ 5                | 51 $\pm$ 4                | 20 $\pm$ 6                  | 38 $\pm$ 10                 |
| <b>F45</b>          | 4.8 $\pm$ 0.1             | 13 $\pm$ 2                | 8 $\pm$ 10                  | 92 $\pm$ 2                  |

| <i>Continued...</i> | <b>Agonism<sup>b</sup></b> |                              | <b>Antagonism<sup>c</sup></b> |                              |
|---------------------|----------------------------|------------------------------|-------------------------------|------------------------------|
| <b>compound</b>     | <b>1 <math>\mu</math>M</b> | <b>100 <math>\mu</math>M</b> | <b>1 <math>\mu</math>M</b>    | <b>100 <math>\mu</math>M</b> |
|                     | Activity (%) <sup>d</sup>  | Activity (%) <sup>d</sup>    | Inhibition (%) <sup>e</sup>   | Inhibition (%) <sup>e</sup>  |
| <b>E28</b>          | 71 $\pm$ 12                | 66 $\pm$ 7                   | 11 $\pm$ 18                   | 6 $\pm$ 15                   |
| <b>F47</b>          | 4 $\pm$ 2                  | 50 $\pm$ 5                   | 3 $\pm$ 14                    | 36 $\pm$ 10                  |
| <b>9</b>            | 52 $\pm$ 4                 | 59 $\pm$ 6                   | 32 $\pm$ 10                   | 11 $\pm$ 16                  |
| <b>E34</b>          | 33 $\pm$ 4                 | 53 $\pm$ 5                   | 21 $\pm$ 15                   | 39 $\pm$ 8                   |
| <b>E37</b>          | 57 $\pm$ 4                 | 70 $\pm$ 15                  | 34 $\pm$ 5                    | 23 $\pm$ 5                   |
| <b>E38</b>          | 35 $\pm$ 2                 | 56 $\pm$ 9                   | 15 $\pm$ 11                   | 32 $\pm$ 6                   |
| <b>E39</b>          | 41 $\pm$ 6                 | 72 $\pm$ 12                  | 10 $\pm$ 15                   | 12 $\pm$ 3                   |
| <b>E15</b>          | 86 $\pm$ 4                 | 126 $\pm$ 3                  | -3 $\pm$ 5                    | -17 $\pm$ 7                  |
| <b>E16</b>          | 86 $\pm$ 6                 | 104 $\pm$ 4                  | -2 $\pm$ 8                    | -4 $\pm$ 5                   |
| <b>E22</b>          | 96 $\pm$ 6                 | 136 $\pm$ 6                  | -5 $\pm$ 11                   | -15 $\pm$ 8                  |
| <b>E25</b>          | 78 $\pm$ 9                 | 76 $\pm$ 7                   | 5 $\pm$ 18                    | 9 $\pm$ 12                   |
| <b>RN22</b>         | 94 $\pm$ 19                | 76 $\pm$ 5                   | -4 $\pm$ 9                    | 3 $\pm$ 9                    |
| <b>B8</b>           | 12 $\pm$ 1                 | 77 $\pm$ 4                   | 26 $\pm$ 3                    | -13 $\pm$ 11                 |
| <b>B6</b>           | 12 $\pm$ 3                 | 51 $\pm$ 1                   | 25 $\pm$ 11                   | -14 $\pm$ 17                 |
| <b>Q2</b>           | 10 $\pm$ 4                 | 72 $\pm$ 1                   | 17 $\pm$ 2                    | 9 $\pm$ 13                   |
| <b>Q1</b>           | 8 $\pm$ 2                  | 74 $\pm$ 3                   | 2 $\pm$ 5                     | -3 $\pm$ 18                  |
| <b>Q3</b>           | 3 $\pm$ 5                  | 55 $\pm$ 3                   | 34 $\pm$ 2                    | -26 $\pm$ 17                 |
| <b>Q4</b>           | 1 $\pm$ 4                  | 26 $\pm$ 3                   | 30 $\pm$ 4                    | -25 $\pm$ 15                 |
| <b>Q5</b>           | 0 $\pm$ 1                  | 24 $\pm$ 4                   | 28 $\pm$ 10                   | -14 $\pm$ 10                 |
| <b>Q6</b>           | 3 $\pm$ 2                  | 53 $\pm$ 2                   | 26 $\pm$ 18                   | -6 $\pm$ 14                  |
| <b>Q7</b>           | 1 $\pm$ 2                  | 55 $\pm$ 3                   | 28 $\pm$ 7                    | 20 $\pm$ 9                   |
| <b>Q8</b>           | 2 $\pm$ 3                  | 53 $\pm$ 5                   | 17 $\pm$ 3                    | 11 $\pm$ 3                   |
| <b>Q12</b>          | 11 $\pm$ 7                 | 12 $\pm$ 4                   | 20 $\pm$ 9                    | 26 $\pm$ 14                  |
| <b>Q11</b>          | 16 $\pm$ 7                 | 59 $\pm$ 12                  | 7 $\pm$ 7                     | -2 $\pm$ 12                  |
| <b>Q13</b>          | 13 $\pm$ 6                 | 85 $\pm$ 10                  | 19 $\pm$ 8                    | -14 $\pm$ 2                  |
| <b>D13</b>          | 7 $\pm$ 3                  | 6 $\pm$ 2                    | 17 $\pm$ 7                    | 23 $\pm$ 7                   |
| <b>R3</b>           | 11 $\pm$ 3                 | 55 $\pm$ 2                   | 23 $\pm$ 8                    | 11 $\pm$ 10                  |
| <b>R1</b>           | 7 $\pm$ 1                  | 10 $\pm$ 1                   | 22 $\pm$ 6                    | 13 $\pm$ 8                   |
| <b>R2</b>           | 7 $\pm$ 2                  | 31 $\pm$ 8                   | 16 $\pm$ 9                    | 11 $\pm$ 6                   |
| <b>R4</b>           | 9 $\pm$ 4                  | 13 $\pm$ 1                   | 23 $\pm$ 9                    | 11 $\pm$ 12                  |
| <b>R5</b>           | 8 $\pm$ 1                  | 29 $\pm$ 1                   | 10 $\pm$ 18                   | -1 $\pm$ 9                   |
| <b>R7</b>           | 6 $\pm$ 1                  | 0 $\pm$ 2                    | 8 $\pm$ 6                     | 43 $\pm$ 15                  |
| <b>R8</b>           | 8 $\pm$ 1                  | 23 $\pm$ 2                   | 18 $\pm$ 5                    | 67 $\pm$ 5                   |
| <b>R9</b>           | 13 $\pm$ 5                 | 10 $\pm$ 4                   | 22 $\pm$ 10                   | 42 $\pm$ 13                  |
| <b>S1</b>           | 74 $\pm$ 6                 | 100 $\pm$ 7                  | 24 $\pm$ 11                   | -8 $\pm$ 7                   |
| <b>S2</b>           | 10 $\pm$ 4                 | 57 $\pm$ 3                   | 48 $\pm$ 3                    | 2 $\pm$ 11                   |
| <b>S3</b>           | 48 $\pm$ 11                | 85 $\pm$ 3                   | 25 $\pm$ 8                    | 7 $\pm$ 13                   |
| <b>A9</b>           | 36 $\pm$ 1                 | 83 $\pm$ 8                   | 10 $\pm$ 9                    | 13 $\pm$ 2                   |
| <b>A13</b>          | 16 $\pm$ 2                 | 77 $\pm$ 11                  | 26 $\pm$ 10                   | -2 $\pm$ 5                   |
| <b>6</b>            | 52 $\pm$ 13                | 65 $\pm$ 16                  | 31 $\pm$ 6                    | 21 $\pm$ 10                  |

| <i>Continued...</i>   | <b>Agonism<sup>b</sup></b> |                              | <b>Antagonism<sup>c</sup></b> |                              |
|-----------------------|----------------------------|------------------------------|-------------------------------|------------------------------|
| <b>compound</b>       | <b>1 <math>\mu</math>M</b> | <b>100 <math>\mu</math>M</b> | <b>1 <math>\mu</math>M</b>    | <b>100 <math>\mu</math>M</b> |
|                       | Activity (%) <sup>d</sup>  | Activity (%) <sup>d</sup>    | Inhibition (%) <sup>e</sup>   | Inhibition (%) <sup>e</sup>  |
| <b>B3</b>             | 24 $\pm$ 3                 | 78 $\pm$ 3                   | 34 $\pm$ 5                    | 16 $\pm$ 3                   |
| <b>S5</b>             | -2 $\pm$ 1                 | 69 $\pm$ 3                   | 19 $\pm$ 4                    | 13 $\pm$ 10                  |
| <b>S7</b>             | 84 $\pm$ 2                 | 97 $\pm$ 5                   | 7 $\pm$ 14                    | 1 $\pm$ 7                    |
| <b>B11</b>            | 88 $\pm$ 15                | 108 $\pm$ 6                  | 6 $\pm$ 5                     | 8 $\pm$ 14                   |
| <b>S4</b>             | 59 $\pm$ 6                 | 115 $\pm$ 7                  | 27 $\pm$ 11                   | -8 $\pm$ 11                  |
| <b>B12</b>            | 86 $\pm$ 12                | 117 $\pm$ 10                 | 7 $\pm$ 7                     | 14 $\pm$ 9                   |
| <b>B13</b>            | 67 $\pm$ 13                | 107 $\pm$ 6                  | 8 $\pm$ 10                    | 13 $\pm$ 13                  |
| <b>B14</b>            | 41 $\pm$ 8                 | 92 $\pm$ 5                   | 10 $\pm$ 2                    | 18 $\pm$ 5                   |
| <b>B5</b>             | 12 $\pm$ 3                 | 57 $\pm$ 1                   | 30 $\pm$ 15                   | -8 $\pm$ 5                   |
| <b>D3</b>             | 58 $\pm$ 1                 | 82 $\pm$ 4                   | 10 $\pm$ 2                    | 6 $\pm$ 9                    |
| <b>10</b>             | 30 $\pm$ 4                 | 52 $\pm$ 11                  | 9 $\pm$ 12                    | 5 $\pm$ 15                   |
| <b>16</b>             | 50 $\pm$ 7                 | 19 $\pm$ 2                   | 8 $\pm$ 14                    | 84 $\pm$ 6                   |
| <b>5</b>              | 67 $\pm$ 17                | 69 $\pm$ 15                  | 23 $\pm$ 9                    | 17 $\pm$ 3                   |
| <b>H15</b>            | 29 $\pm$ 3                 | 59 $\pm$ 14                  | 6 $\pm$ 14                    | 19 $\pm$ 11                  |
| <b>H23</b>            | 70 $\pm$ 8                 | 81 $\pm$ 15                  | 12 $\pm$ 8                    | 1 $\pm$ 9                    |
| <b>B10</b>            | 12 $\pm$ 2                 | 73 $\pm$ 5                   | 16 $\pm$ 5                    | -56 $\pm$ 11                 |
| <b>D4</b>             | 23 $\pm$ 1                 | 76 $\pm$ 4                   | 28 $\pm$ 13                   | -6 $\pm$ 4                   |
| <b>D6</b>             | 41 $\pm$ 5                 | 80 $\pm$ 5                   | 21 $\pm$ 19                   | 3 $\pm$ 12                   |
| <b>D7</b>             | 31 $\pm$ 8                 | 74 $\pm$ 4                   | 20 $\pm$ 6                    | 11 $\pm$ 9                   |
| <b>D9</b>             | 13 $\pm$ 1                 | 52 $\pm$ 6                   | 26 $\pm$ 6                    | 9 $\pm$ 1                    |
| <b>D10</b>            | 6 $\pm$ 2                  | 22 $\pm$ 2                   | 23 $\pm$ 6                    | 14 $\pm$ 12                  |
| <b>D16</b>            | 13 $\pm$ 4                 | 83 $\pm$ 4                   | 19 $\pm$ 6                    | 3 $\pm$ 6                    |
| <b>D18</b>            | 16 $\pm$ 4                 | 53 $\pm$ 2                   | 18 $\pm$ 8                    | 32 $\pm$ 5                   |
| <b>11</b>             | -8 $\pm$ 3                 | -33 $\pm$ 2                  | 64 $\pm$ 6                    | 128 $\pm$ 1                  |
| <b>Az-11</b>          | 109 $\pm$ 15               | 104 $\pm$ 4                  | -1 $\pm$ 17                   | -35 $\pm$ 6                  |
| <b>12</b>             | -2 $\pm$ 2                 | 16 $\pm$ 2                   | 20 $\pm$ 19                   | 43 $\pm$ 13                  |
| <b>13</b>             | 1 $\pm$ 3                  | 61 $\pm$ 6                   | 10 $\pm$ 8                    | 37 $\pm$ 5                   |
| <b>14</b>             | 7 $\pm$ 12                 | 61 $\pm$ 4                   | 22 $\pm$ 19                   | 12 $\pm$ 8                   |
| <b>15</b>             | -1 $\pm$ 2                 | 13 $\pm$ 4                   | 16 $\pm$ 16                   | 13 $\pm$ 8                   |
| <b>F31</b>            | 5 $\pm$ 2                  | 32 $\pm$ 2                   | 31 $\pm$ 5                    | 15 $\pm$ 4                   |
| <b>18</b>             | -1 $\pm$ 3                 | 43 $\pm$ 3                   | 39 $\pm$ 11                   | 45 $\pm$ 5                   |
| <b>F55</b>            | 2 $\pm$ 1                  | 37 $\pm$ 6                   | 11 $\pm$ 4                    | 26 $\pm$ 7                   |
| <b>19R</b>            | -1 $\pm$ 4                 | 35 $\pm$ 8                   | 43 $\pm$ 10                   | 38 $\pm$ 11                  |
| <b>19P</b>            | -2 $\pm$ 3                 | -4 $\pm$ 1                   | 39 $\pm$ 16                   | 25 $\pm$ 16                  |
| <b>20</b>             | 2 $\pm$ 6                  | 34 $\pm$ 11                  | 35 $\pm$ 18                   | 39 $\pm$ 17                  |
| <b>21<sup>f</sup></b> | -2 $\pm$ 3                 | -- <sup>f</sup>              | 29 $\pm$ 13                   | -- <sup>f</sup>              |
| <b>22</b>             | -2 $\pm$ 3                 | 8 $\pm$ 6                    | 35 $\pm$ 11                   | 23 $\pm$ 18                  |
| <b>23</b>             | -1 $\pm$ 4                 | -2 $\pm$ 2                   | 8 $\pm$ 14                    | 12 $\pm$ 4                   |
