# Supplementary material for: Non-native autoinducer analogs capable of modulating the SdiA quorum sensing receptor in Salmonella enterica serovar Typhimurium
Source: PubMed Central journal article supplement (PMC6204753; doi:10.3762/bjoc.14.243), 2018-10-17
Supplement: Beilstein_J_Org_Chem-14-2651-s003.pdf [file Beilstein_J_Org_Chem-14-2651-s003.pdf]

**Supporting Information File 3**  
**for**

**Non-native autoinducer analogs capable of modulating the SdiA  
quorum sensing receptor in *Salmonella enterica* serovar Typhimurium**

Matthew J. Styles and Helen E. Blackwell\*

Address: Department of Chemistry, University of Wisconsin–Madison, 1101 University Avenue,  
Madison, WI 53706, USA

\* Corresponding author

Email: Helen E. Blackwell - [blackwell@chem.wisc.edu](mailto:blackwell@chem.wisc.edu)

**Competition assay efficacy and potency data**

**Table S1:** Efficacy and potency data for OOHL (**2**) in competition against antagonists **F45**, **R8**, and **11** at varying concentrations.<sup>a</sup> See Figure 5 in main article for dose–response curves.

| Compound             | Concentration (μM) | Activation (%)   | 95% CI (%) <sup>b</sup> | EC <sub>50</sub> (nM) | 95% CI (nM) <sup>c</sup> |
|----------------------|--------------------|------------------|-------------------------|-----------------------|--------------------------|
| <i>No antagonist</i> | 0                  | 110 <sup>d</sup> | 103–117                 | 1.03                  | 0.549–1.48               |
| <b>F45</b>           | 0.1                | 84               | 79–89                   | 1.77                  | 1.04–3.01                |
| <b>F45</b>           | 1                  | 77               | 73–80                   | 1.33                  | 0.78–2.26                |
| <b>F45</b>           | 10                 | 56               | 52–61                   | 4.11                  | 1.40–12.1                |
| <b>F45</b>           | 100                | 21               | 14–28                   | -- <sup>e</sup>       | --                       |
| <b>R8</b>            | 0.1                | 96               | 91–100                  | 1.57                  | 1.03–2.40                |
| <b>R8</b>            | 1                  | 95               | 91–99                   | 1.51                  | 0.98–2.32                |
| <b>R8</b>            | 10                 | 114 <sup>d</sup> | 108–120                 | 2.52                  | 1.44–4.43                |
| <b>R8</b>            | 100                | 79               | 75–83                   | 10.6                  | 4.8–23.5                 |
| <b>11</b>            | 0.1                | 97               | 92–102                  | 72.3                  | 48.3–108                 |
| <b>11</b>            | 1                  | 97               | 91–103                  | 220                   | 151–321                  |
| <b>11</b>            | 10                 | 78               | 73–82                   | 1313                  | 999–1725                 |
| <b>11</b>            | 100                | 20               | 15–26                   | 4673                  | 2510–8701                |

<sup>a</sup>All assays are averages of biological triplicates in the *S. Typhimurium*-pJNS25 SdiA reporter strain (see Experimental Section). <sup>b</sup>CI = confidence interval for the Activation % ( $p = 0.05$ ). <sup>c</sup>CI = confidence interval for the EC<sub>50</sub> ( $p = 0.05$ ). <sup>d</sup>Not significantly different than the positive control ( $p = 0.05$ ). <sup>e</sup>Non-linear fit could not be completed.
